# Supplementary material
Source: publisher figshare collection journal article supplement (https://frontiersin.figshare.com/ndownloader/files/22551320)
Supplement: Supplementary file [file 22551320]

# Blood Loss Estimation

## The Guide

Please return to the survey when you have finished examining this Guide

2 L  
Suction  
Pot

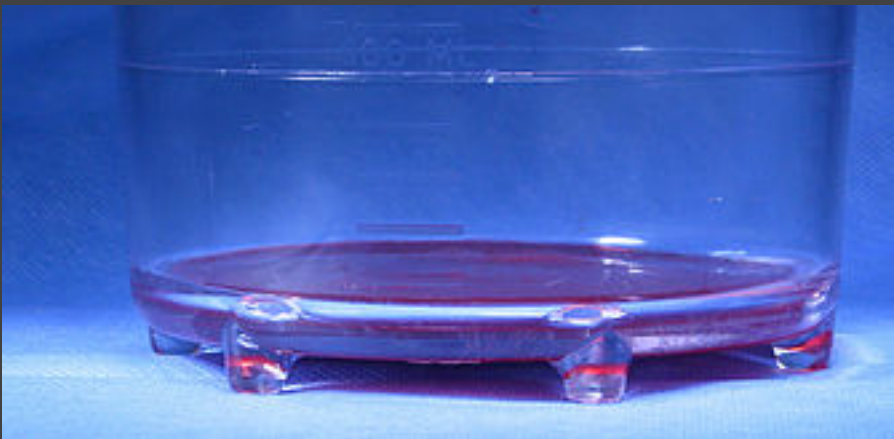

40 mL

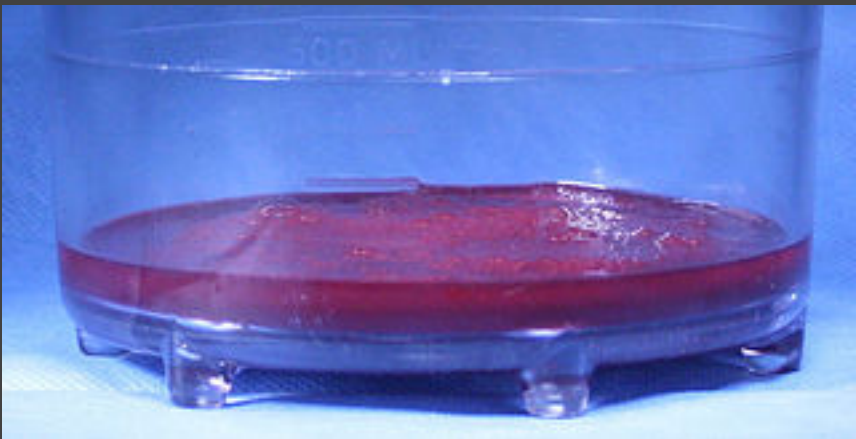

120 mL

500 mL  
Kidney  
Dish

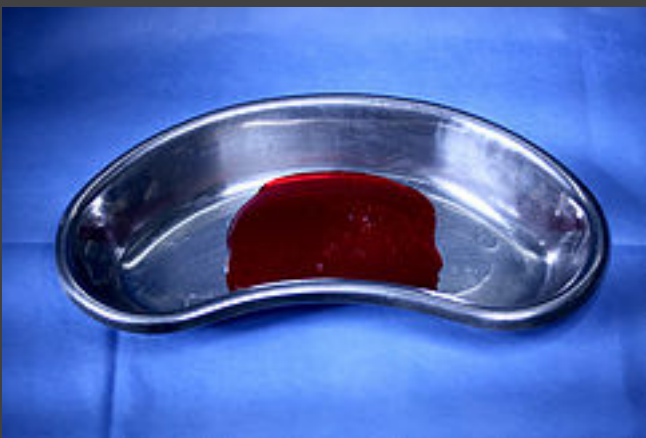

20 mL

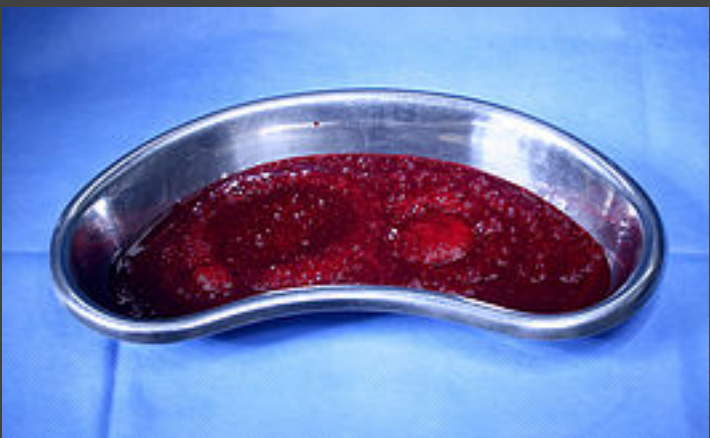

140 mL

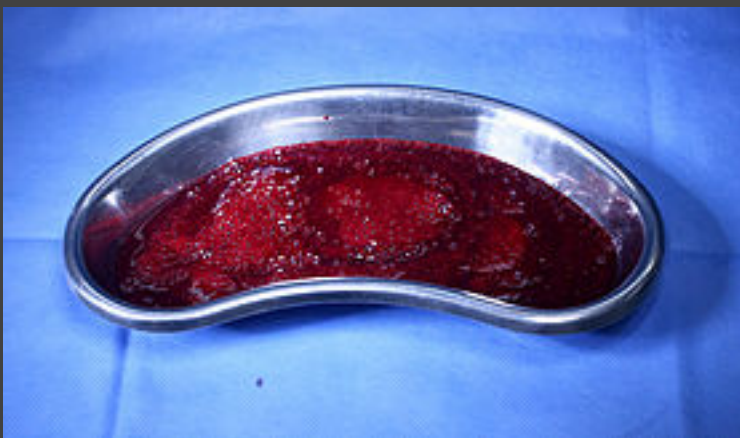

200 mL

Lap  
Sponge  
30 x 30  
cm

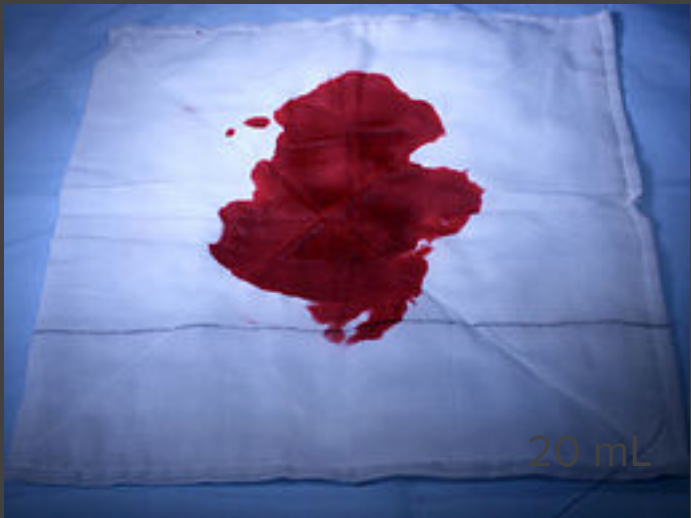

20 mL

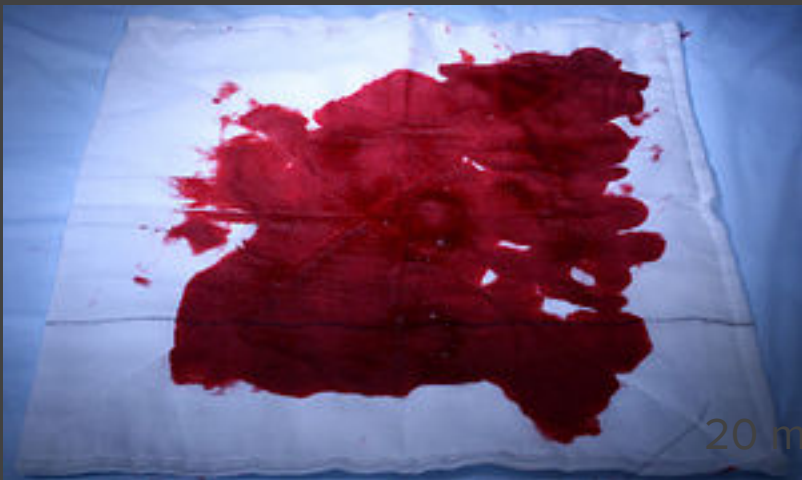

60 mL

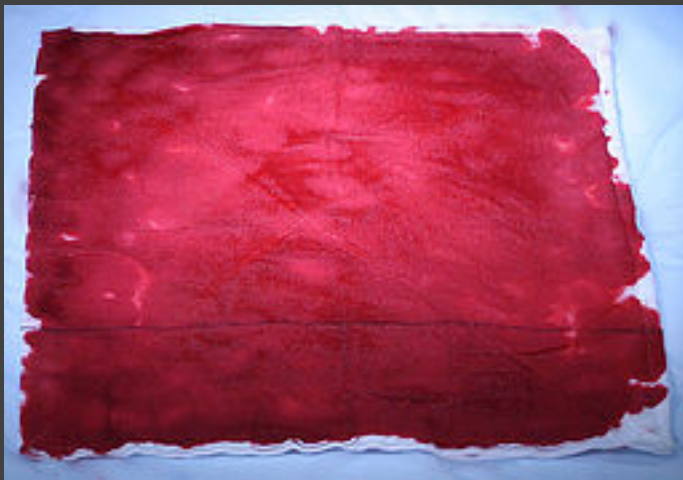

120 mL

Swab  
10 x 10  
cm

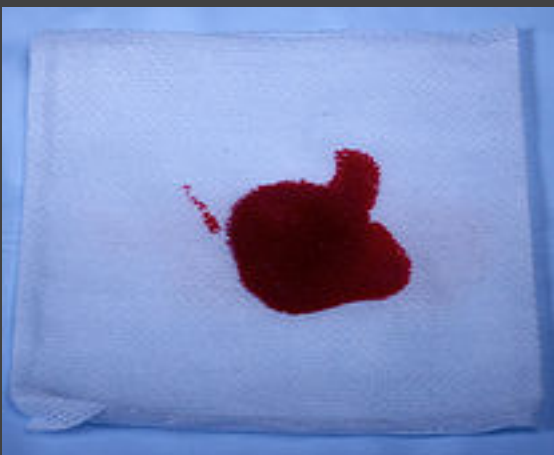

1 mL

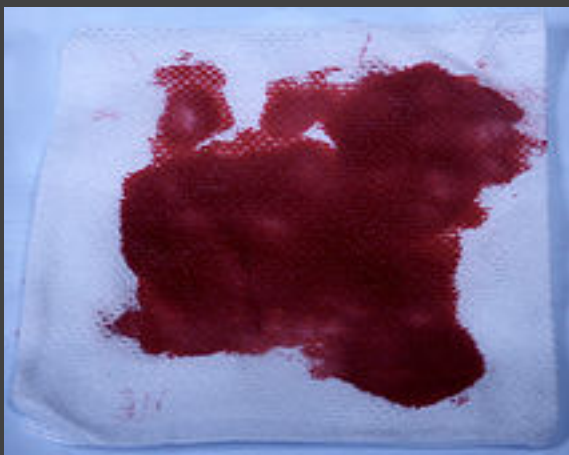

4 mL

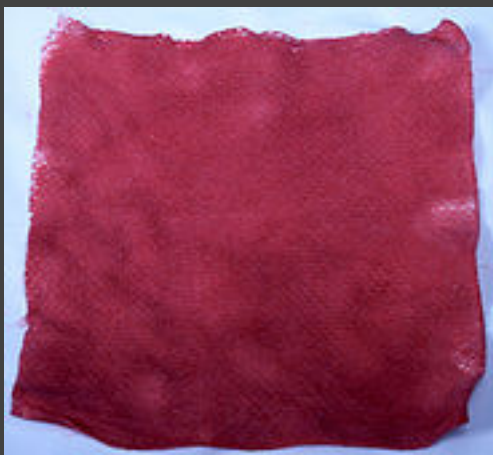

8 mL

Puddle

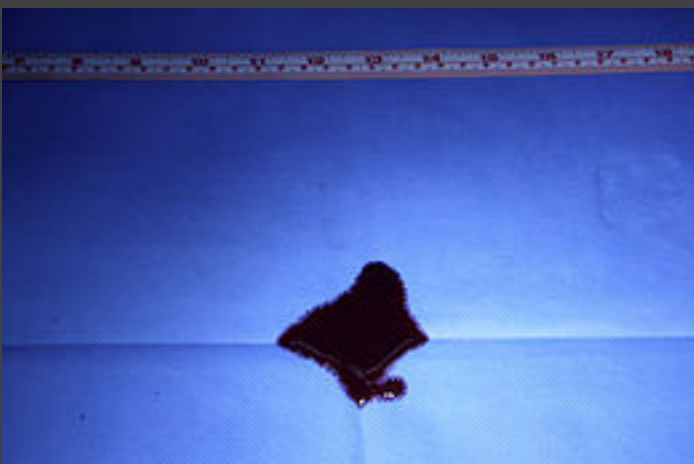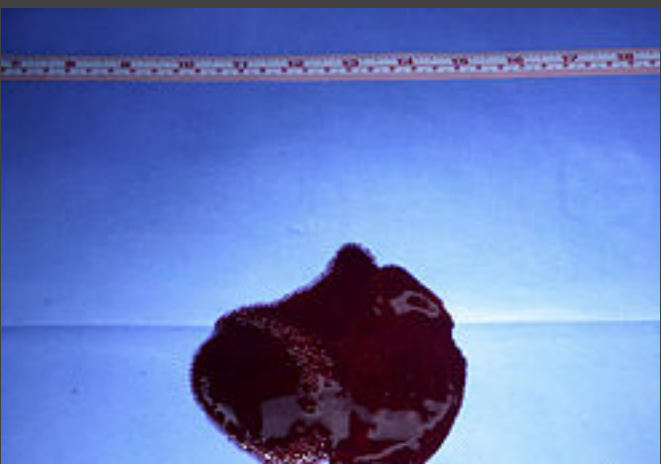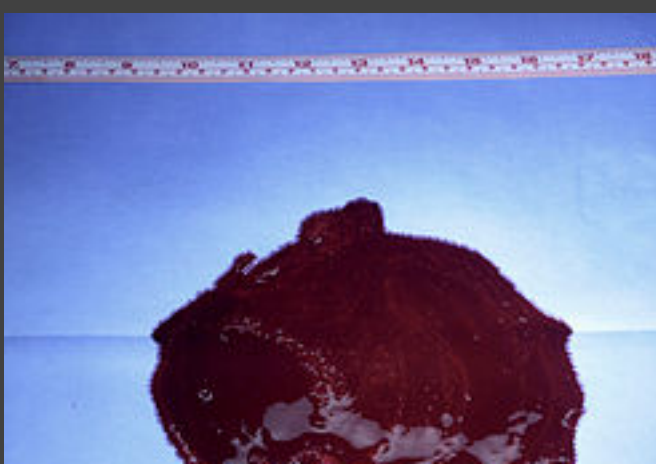

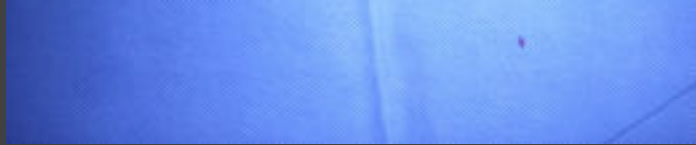

5 mL

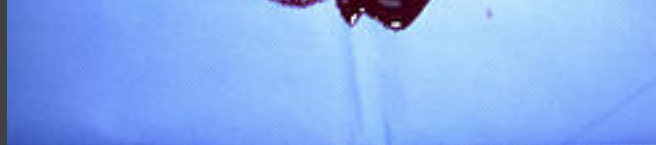

30 mL

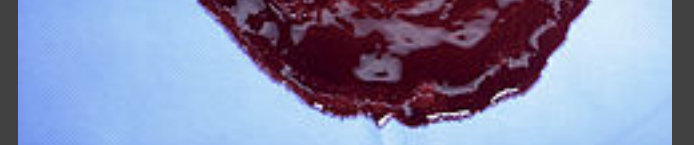

70 mL

Please return to the survey when you have finished examining this Guide
